# Supplementary material for: Comparative Analysis of Emerging B.1.1.7+E484K SARS-CoV-2 isolates from Pennsylvania
Source: PubMed Central journal article supplement — bioRxiv. 2021 Apr 21:2021.04.21.440801. Preprint. [Version 1] doi: 10.1101/2021.04.21.440801 (PMC8077577; doi:10.1101/2021.04.21.440801), 2021-04-21
Supplement: NIHPP2021.04.21.440801-supplement-1.pdf [file NIHPP2021.04.21.440801-supplement-1.pdf]

214 **Supplementary Table 1. Excel Sheet of GNUVID results for the 236 isolates.**

215 **Supplementary Table 2. Mutations and deletions in CHOP\_204 compared to**

216 MN908947.3.

| <b>Mutation</b> | <b>Protein</b> | <b>AA change</b>    | <b>Frequency</b> |
|-----------------|----------------|---------------------|------------------|
| C241T           | -              | -                   | 1                |
| C913T           | ORF1ab         | synonymous          | 0.92             |
| C1059T          | ORF1ab         | T265I               | 0.33             |
| C2110T          | ORF1ab         | synonymous          | 0.98             |
| C3037T          | ORF1ab         | synonymous          | 1                |
| C3267T          | ORF1ab         | T1001I              | 0.64             |
| C4320T          | ORF1ab         | synonymous          | 0.38             |
| C5388A          | ORF1ab         | A1708D              | 0.65             |
| C5986T          | ORF1ab         | synonymous          | 0.62             |
| T6954C          | ORF1ab         | I2230T              | 0.74             |
| T7984C          | ORF1ab         | synonymous          | 0.65             |
| T9867C          | ORF1ab         | L3201P              | 0.33             |
| 11288 (del-9)   | ORF1ab         | SGF3675-77 deletion | 0.99             |
| C12781T         | ORF1ab         | synonymous          | 0.96             |
| C14120T         | ORF1ab         | Q4619*              | 0.95             |
| C14408T         | ORF1ab         | synonymous          | 1                |
| C14676T         | ORF1ab         | P4804L              | 0.96             |
| C15279T         | ORF1ab         | T5005I              | 0.66             |
| T16176C         | ORF1ab         | L5304P              | 0.72             |
| A16500C         | ORF1ab         | K5412T              | 0.30             |
| C16887T         | ORF1ab         | synonymous          | 0.31             |
| C19390T         | ORF1ab         | synonymous          | 1                |
| C21575T         | S              | L5F                 | 0.35             |
| 21765 (del6)    | S              | HV69-70 deletion    | 0.99             |
| 21991 (del3)    | S              | Y144 deletion       | 0.98             |
| G23012A         | S              | E484K               | 0.77             |
| A23063T         | S              | N501Y               | 0.95             |
| C23271A         | S              | A570D               | 1                |
| A23403G         | S              | D614G               | 1                |

|               |       |              |      |
|---------------|-------|--------------|------|
| C23604A       | S     | P681H        | 0.98 |
| C23664T       | S     | A701V        | 0.41 |
| C23709T       | S     | T716I        | 0.99 |
| T24506G       | S     | S982A        | 0.55 |
| G24914C       | S     | D1118H       | 0.94 |
| C25517T       | ORF3a | P42L         | 0.36 |
| C27972T       | ORF8  | Q27*         | 0.93 |
| A28095T       | ORF8  | K68*         | 0.93 |
| A28111G       | ORF8  | Y73C         | 0.96 |
| A28271 (del1) | -     | deletion     | 0.97 |
| GAT28280CTA   | N     | D3L          | 0.97 |
| C28869T       | N     | P199L        | 0.38 |
| GGG28881AAC   | N     | R203K, G204R | 0.55 |
| C28977T       | N     | S235F        | 0.88 |
| C29137T       | N     | synonymous   | 0.54 |

217

218 **Supplementary Table 3. GISAID Acknowledgement Table.**

219

220

221

222

223

224

225

226

227

228

229 **Supplementary Figure 1. SNP variations in all available 20I/501Y.V1+E484K**

230 **isolates.**

231

232
